# Supplementary material for: The role of refractive indices in measuring mineral dust with high-spectral resolution infrared satellite sounders: Application to the Gobi Desert
Source: Copernicus journal article supplement (doi:10.5194/egusphere-2024-888), 2024-04-02
Supplement: Supplementary file 1 [file egusphere-2024-888-supplement.pdf]

## Supplementary Material

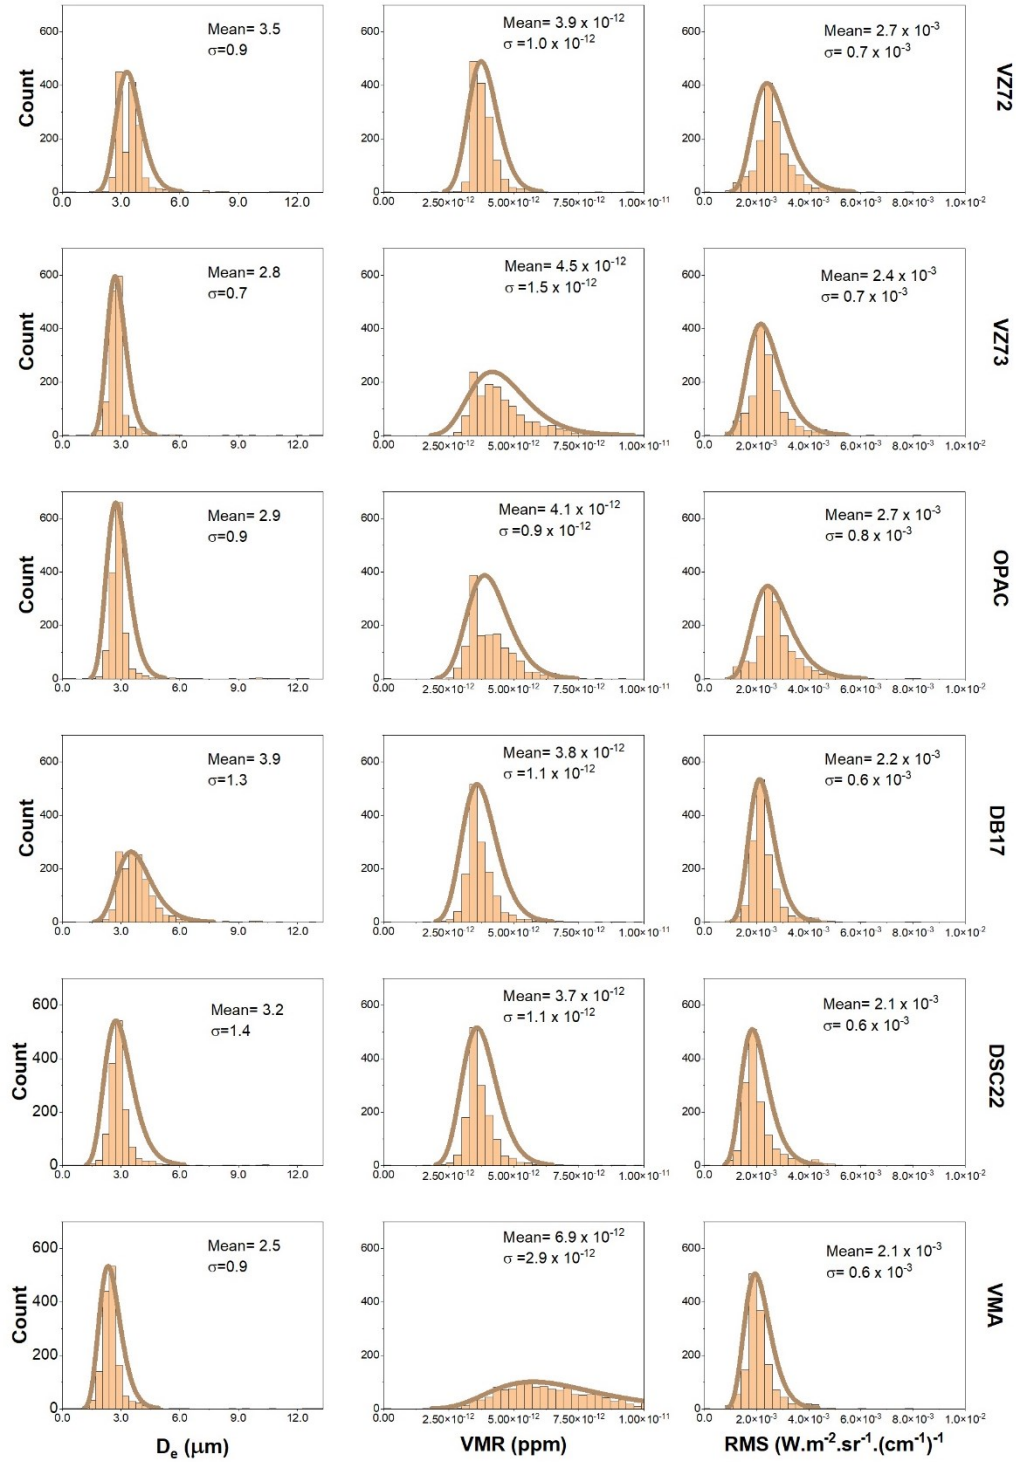

**Figure S1.** The normal distribution of the aerosol parameters retrieval of the dust plume originating from the Gobi Desert in 4 May 2017 applied on six literature CRIs using ARAHMIS: VZ72: Volz, 1972; VZ73: Volz, 1973; OPAC: Hess et al., 1998; DB17: Di Biagio et al., 2017; DSC22: Deschutter, 2022; VMA: Volume mixing approximation from Deschutter, 2022.
